# Supplementary material for: Genetic diversity in the Criollo Argentino horse from SNP array data
Source: Research Square preprint supplement (doi:10.21203/rs.3.rs-8427769/v1), 2026-01-20
Supplement: Supplementary file 1 [file 92807f695767aeef42f56775.docx]

Table S1. Mean values ​​of diversity parameters in the Criollo Argentino analyzed by chromosome using 61,175 SNPs.

Ho and He: observed and expected heterozygosity, respectively. MAF: Minor allele frequency. HWE: Hardy Weinberg Equilibrium.

| **ECA** | **Ho** | **He** | **MAF** | **HWE** | **N° of SNPs** | **Genotyping call rate** |
| --- | --- | --- | --- | --- | --- | --- |
| 1 | 0.349 | 0.344 | 0.253 | 0.713 | 3489 | 0.995 |
| 2 | 0.354 | 0.345 | 0.254 | 0.688 | 2493 | 0.992 |
| 3 | 0.344 | 0.349 | 0.258 | 0.677 | 2171 | 0.994 |
| 4 | 0.344 | 0.343 | 0.252 | 0.704 | 2126 | 0.994 |
| 5 | 0.347 | 0.344 | 0.251 | 0.699 | 2016 | 0.995 |
| 6 | 0.343 | 0.343 | 0.251 | 0.713 | 1793 | 0.995 |
| 7 | 0.353 | 0.345 | 0.254 | 0.717 | 1917 | 0.994 |
| 8 | 0.359 | 0.351 | 0.261 | 0.686 | 2015 | 0.994 |
| 9 | 0.349 | 0.348 | 0.257 | 0.693 | 1691 | 0.995 |
| 10 | 0.348 | 0.343 | 0.253 | 0.704 | 1670 | 0.994 |
| 11 | 0.320 | 0.315 | 0.260 | 0.715 | 1334 | 0.995 |
| 12 | 0.365 | 0.348 | 0.255 | 0.690 | 602 | 0.993 |
| 13 | 0.339 | 0.334 | 0.245 | 0.750 | 743 | 0.995 |
| 14 | 0.334 | 0.342 | 0.251 | 0.688 | 1891 | 0.994 |
| 15 | 0.355 | 0.343 | 0.252 | 0.707 | 1875 | 0.994 |
| 16 | 0.344 | 0.345 | 0.254 | 0.699 | 1817 | 0.994 |
| 17 | 0.348 | 0.341 | 0.249 | 0.692 | 1668 | 0.995 |
| 18 | 0.353 | 0.346 | 0.255 | 0.713 | 1568 | 0.995 |
| 19 | 0.342 | 0.347 | 0.257 | 0.692 | 1234 | 0.994 |
| 20 | 0.351 | 0.346 | 0.254 | 0.695 | 1272 | 0.994 |
| 21 | 0.339 | 0.340 | 0.251 | 0.705 | 1241 | 0.995 |
| 22 | 0.367 | 0.353 | 0.264 | 0.709 | 1038 | 0.993 |
| 23 | 0.367 | 0.350 | 0.258 | 0.723 | 1106 | 0.995 |
| 24 | 0.348 | 0.350 | 0.258 | 0.689 | 1006 | 0.994 |

| 25 | 0.354 | 0.348 | 0.251 | 0.712 | 778 | 0.993 |
| --- | --- | --- | --- | --- | --- | --- |
| 26 | 0.341 | 0.340 | 0.248 | 0.702 | 668 | 0.994 |
| 27 | 0.344 | 0.346 | 0.253 | 0.712 | 813 | 0.995 |
| 28 | 0.342 | 0.344 | 0.253 | 0.675 | 905 | 0.995 |
| 29 | 0.362 | 0.346 | 0.253 | 0.709 | 564 | 0.995 |
| 30 | 0.348 | 0.335 | 0.251 | 0.697 | 628 | 0.995 |
| 31 | 0.346 | 0.347 | 0.259 | 0.682 | 474 | 0.992 |
| **Mean** | **0.348** | **0.344** | **0.254** | **0.702** | **1439** | **0.994** |
